# Supplementary material for: Carotenoid Accumulation and Its Contribution to Flower Coloration of Osmanthus fragrans
Source: PubMed Central journal article supplement (PMC6232703; doi:10.3389/fpls.2018.01499), 2018-10-16
Supplement: Image_1.pdf [file Image_1.pdf]

## Supplementary Material

# Carotenoid accumulation and its contribution to flower coloration of *Osmanthus fragrans*

Yiguang Wang<sup>1</sup>, Chao Zhang<sup>1\*</sup>, Bin Dong<sup>1</sup>, Jianxin Fu<sup>1</sup>, Shaoqing Hu<sup>2</sup>, Hongbo Zhao<sup>1\*</sup>

<sup>1</sup>Department of Ornamental Horticulture, School of Landscape Architecture, Zhejiang Agriculture and Forestry University, Hangzhou, China

<sup>2</sup>College of Civil Engineering and Architecture, Zhejiang Sci-Tech University, Hangzhou, China

### \*Correspondence:

Chao Zhang

zhangchao24804@gmail.com

Hongbo Zhao

zhaohb@zafu.edu.cn

### Supplementary Figures

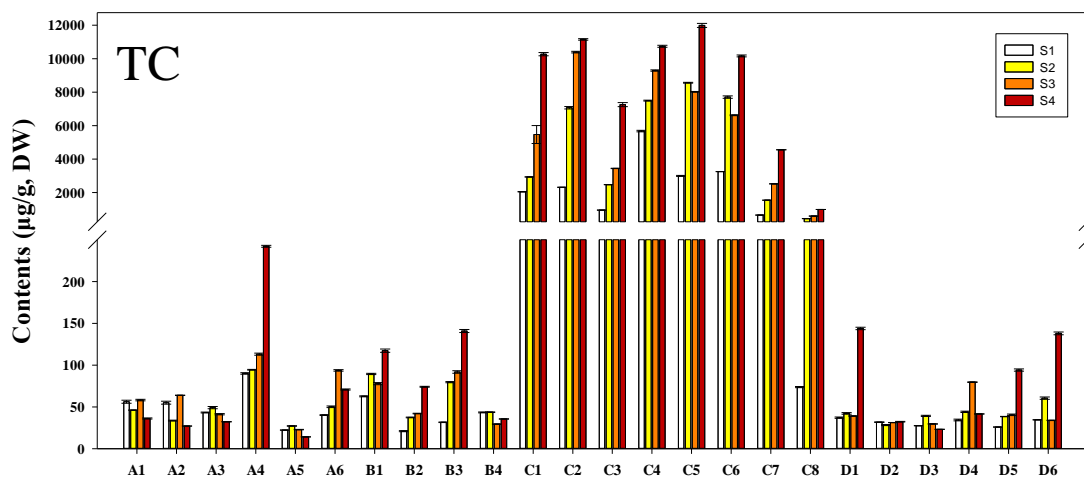

**Figure S1.** Total carotenoid contents in petals of the 24 cultivars during flowering process.

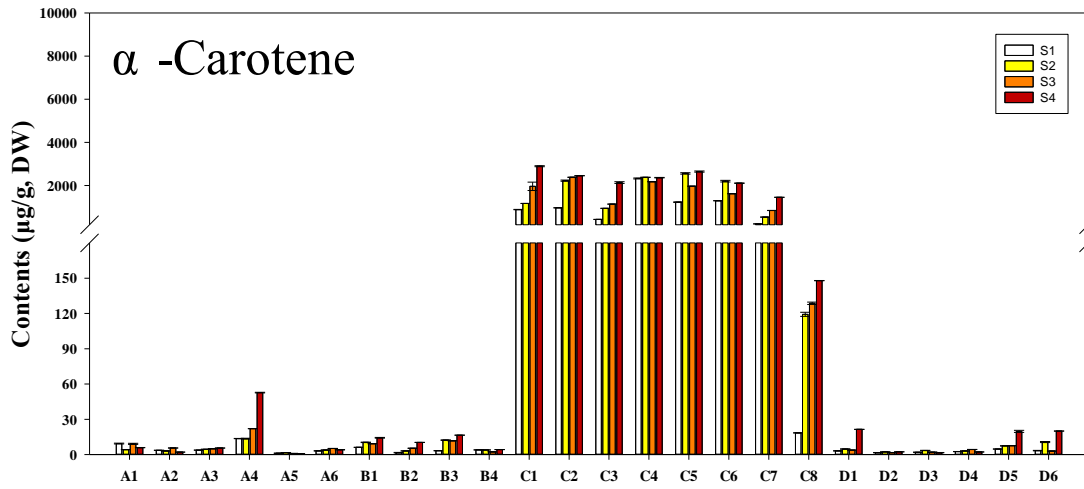

**Figure S2.** Content of  $\alpha$ -carotene in petals of the 24 cultivars during flowering process.

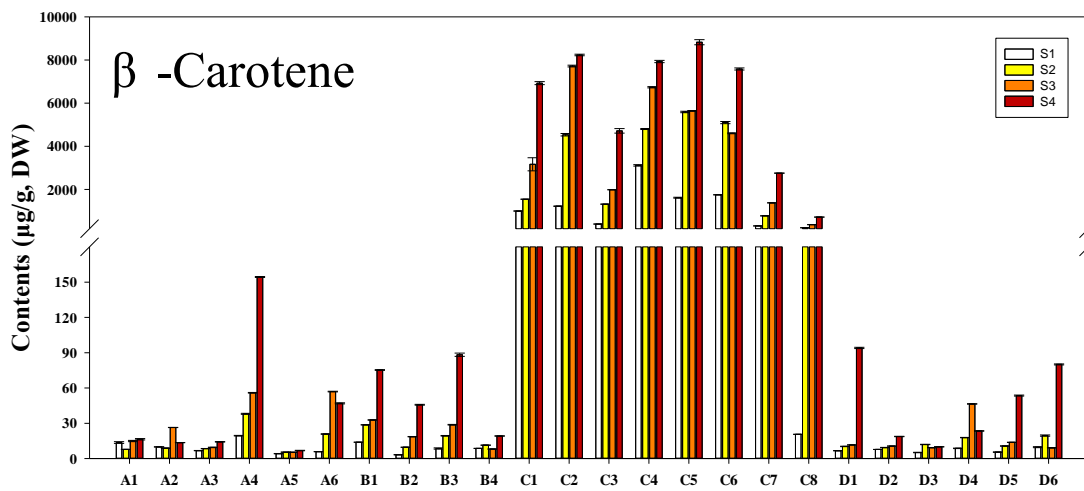

**Figure S3.** Content of  $\beta$ -carotene in petals of the 24 cultivars during flowering process.

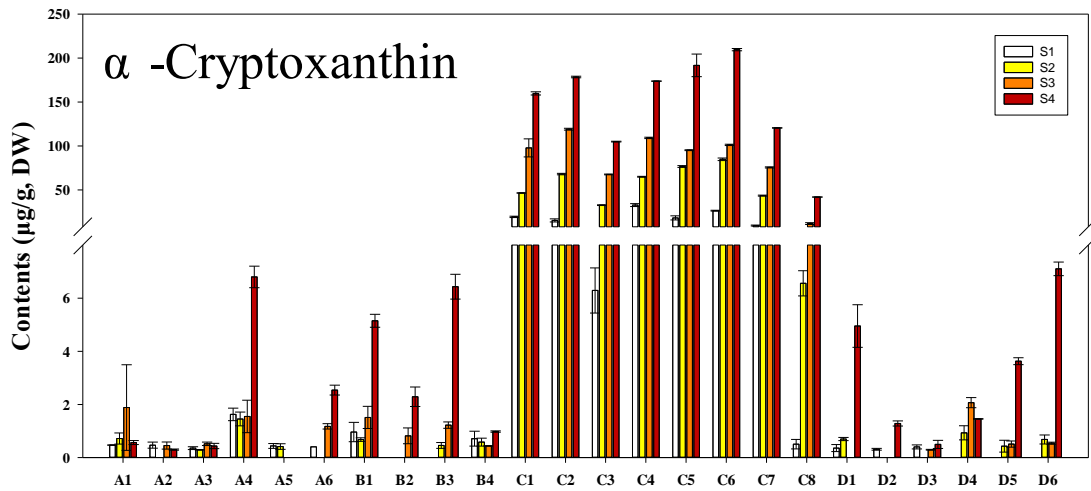

**Figure S4.** Content of  $\alpha$ -cryptoxanthin in petals of the 24 cultivars during flowering process.

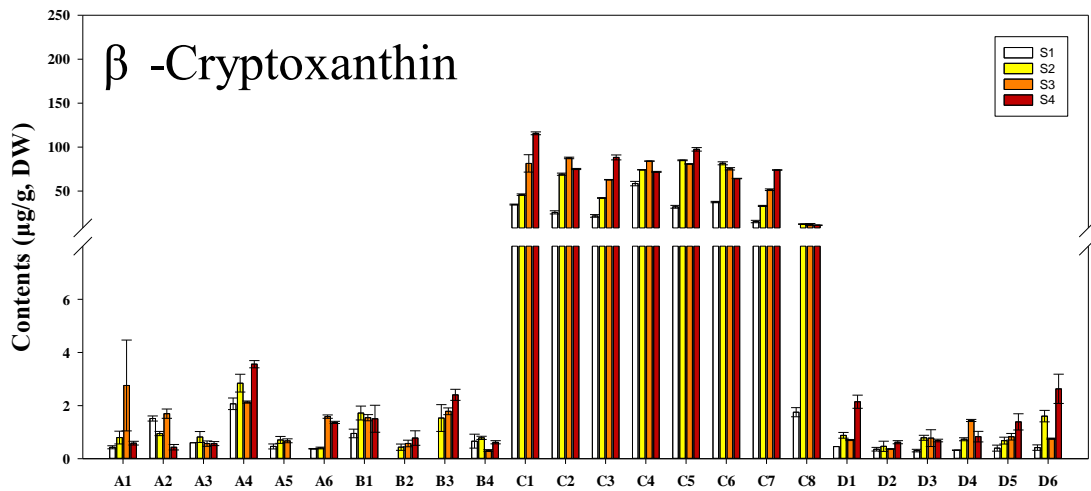

**Figure S5.** Content of  $\beta$ -cryptoxanthin in petals of the 24 cultivars during flowering process.

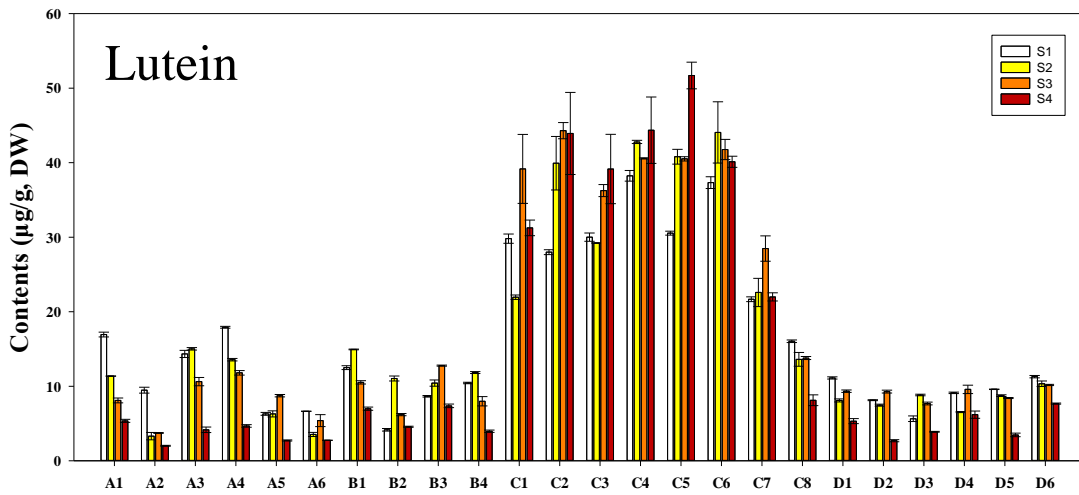

**Figure S6.** Content of lutein in petals of the 24 cultivars during flowering process.

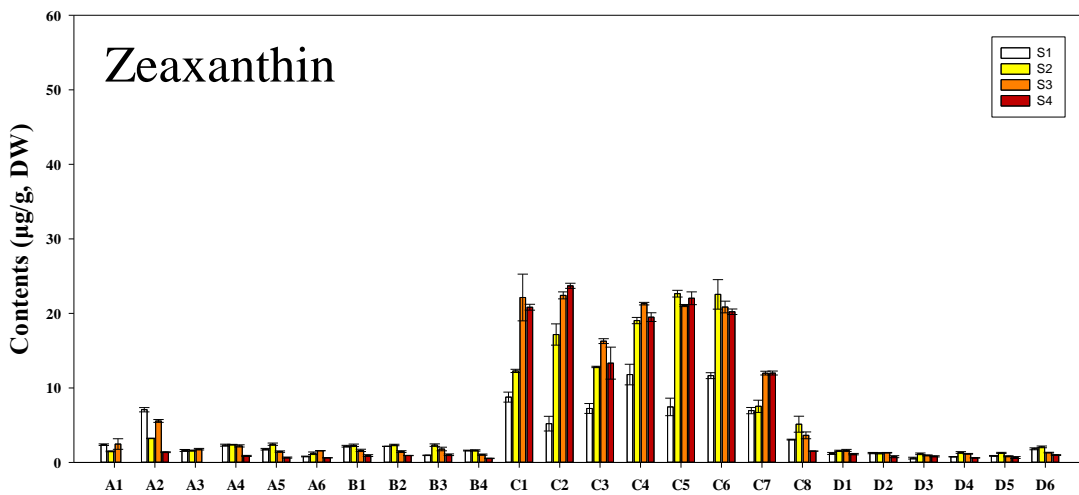

**Figure S7.** Content of zeaxanthin in petals of the 24 cultivars during flowering process.

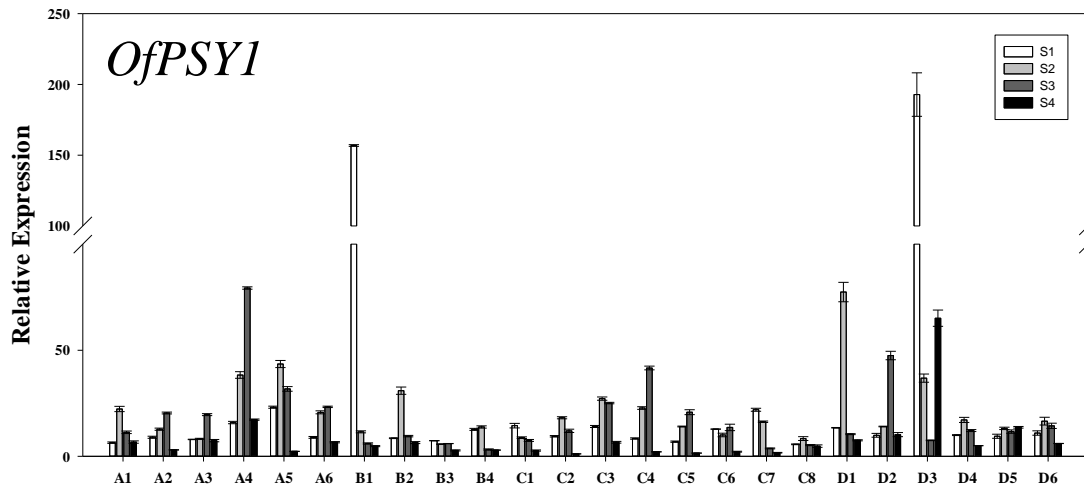

**Figure S8.** Expression pattern of *OfPSY1* in petals of the 24 cultivars during the flowering process.

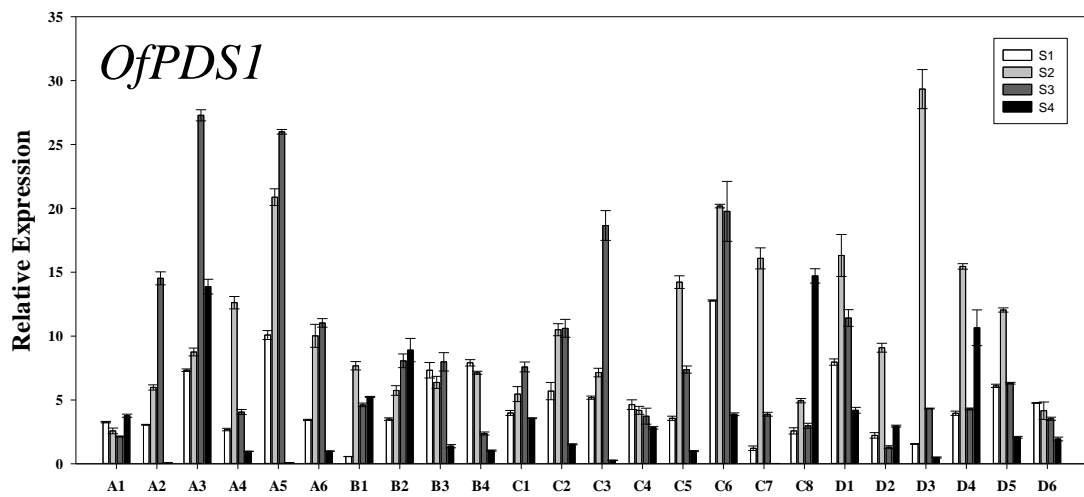

**Figure S9.** Expression pattern of *OfPDS1* in petals of the 24 cultivars during the flowering process.

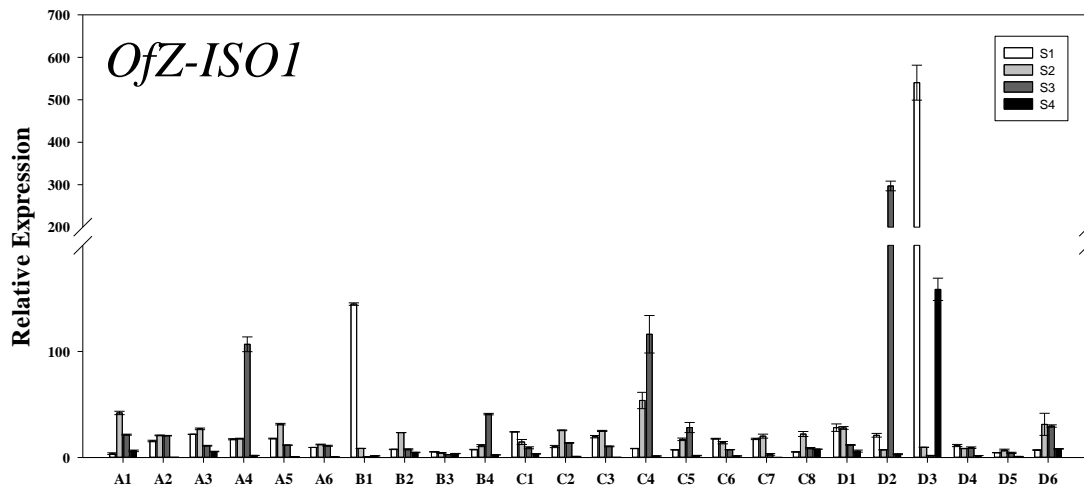

**Figure S10.** Expression pattern of *OfZ-ISO1* in petals of the 24 cultivars during the flowering process.

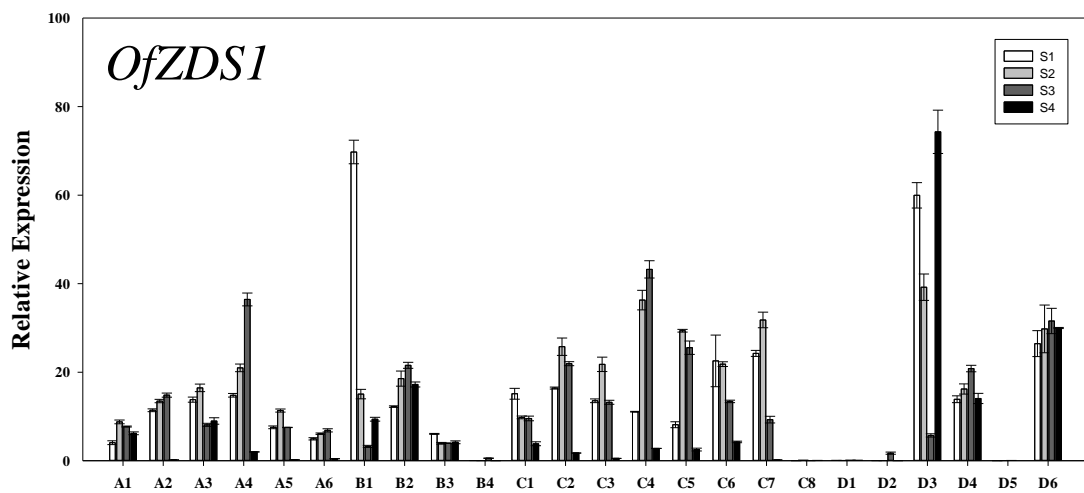

**Figure S11.** Expression pattern of *OfZDS1* in petals of the 24 cultivars during the flowering process.

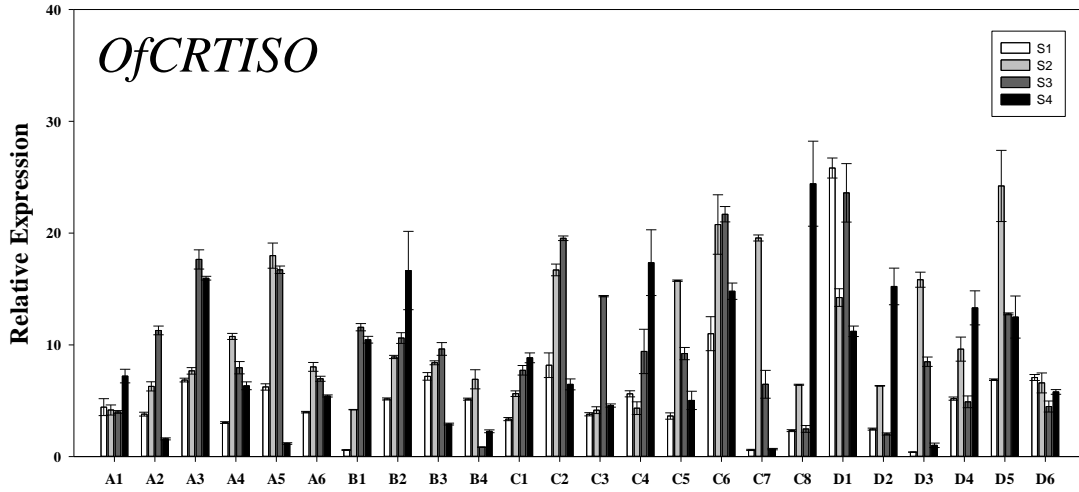

**Figure S12.** Expression pattern of *OfCRTISO1* in petals of the 24 cultivars during the flowering process.

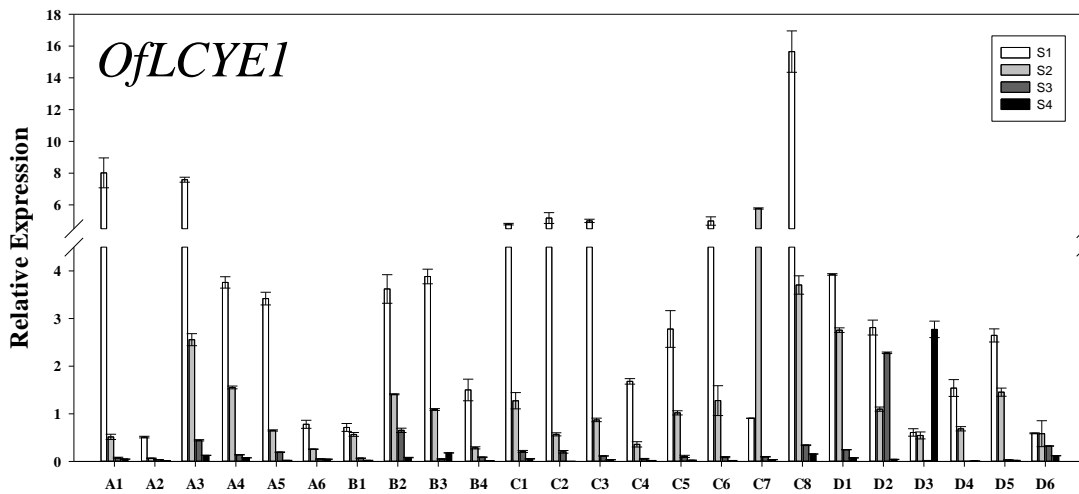

**Figure S13.** Expression pattern of *OfLCYE1* in petals of the 24 cultivars during the flowering process.

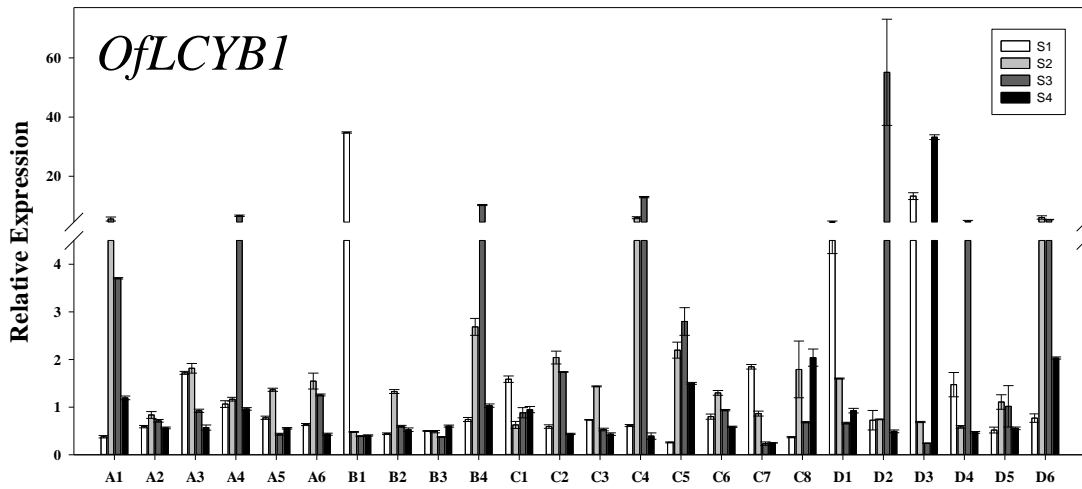

**Figure S14.** Expression pattern of *OfLCYB1* in petals of the 24 cultivars during the flowering process.

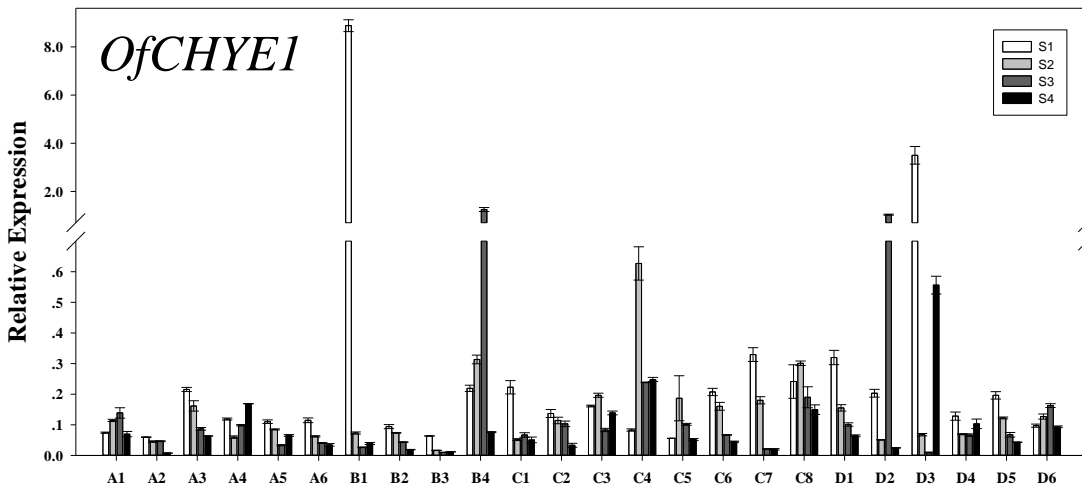

**Figure S15.** Expression pattern of *OfCHYE1* in petals of the 24 cultivars during the flowering process.



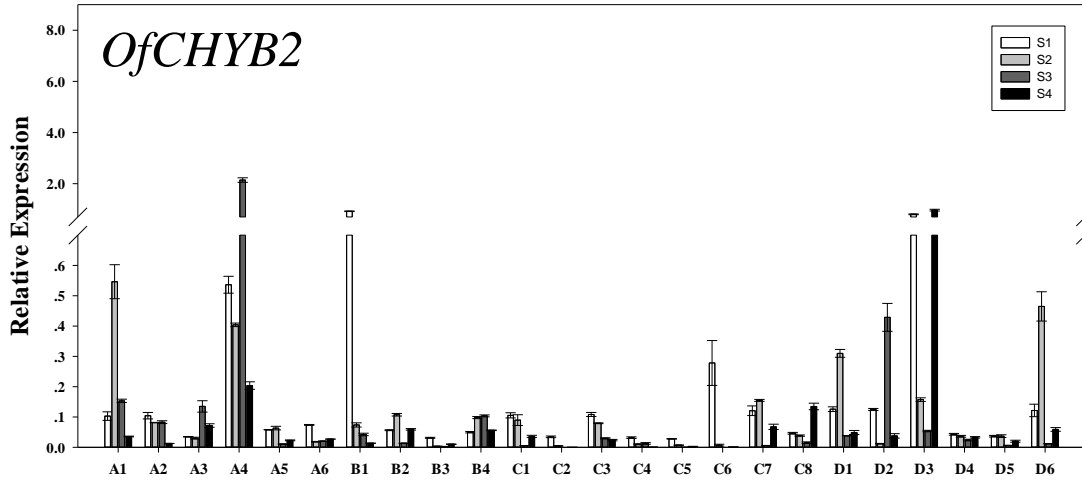

**Figure S16.** Expression pattern of *OfCHYB2* in petals of the 24 cultivars during the flowering process.

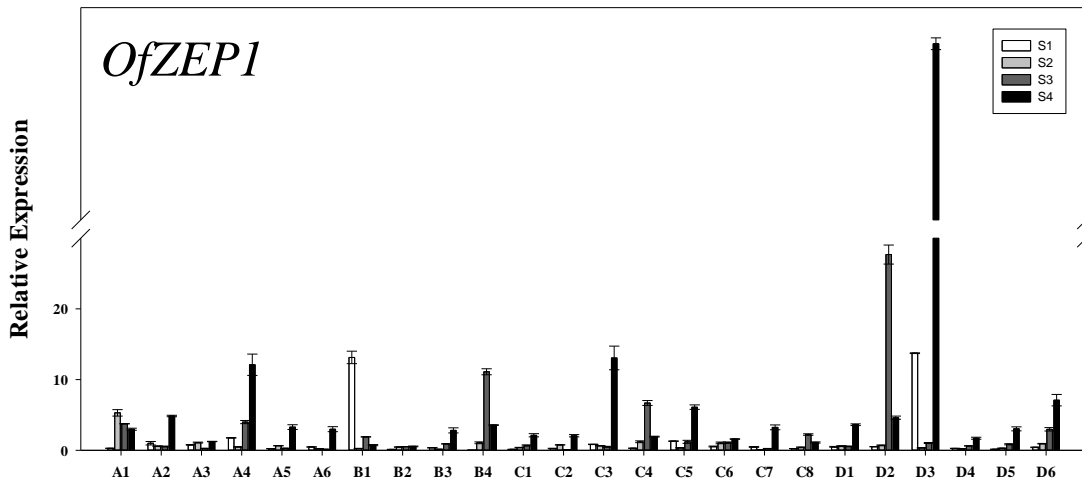

**Figure S17.** Expression pattern of *OfZEP1* in petals of the 24 cultivars during the flowering process.

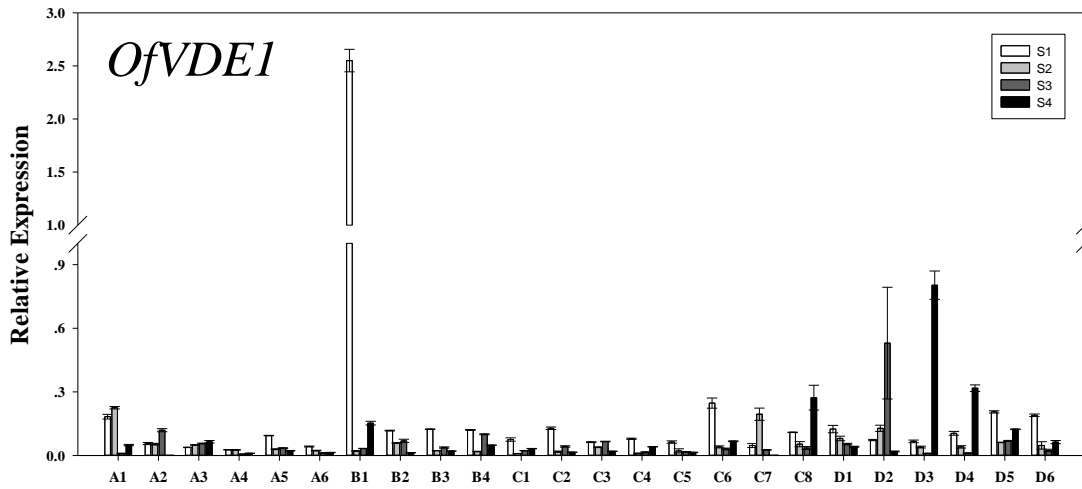

**Figure S18.** Expression pattern of *OfVDE1* in petals of the 24 cultivars during the flowering process.

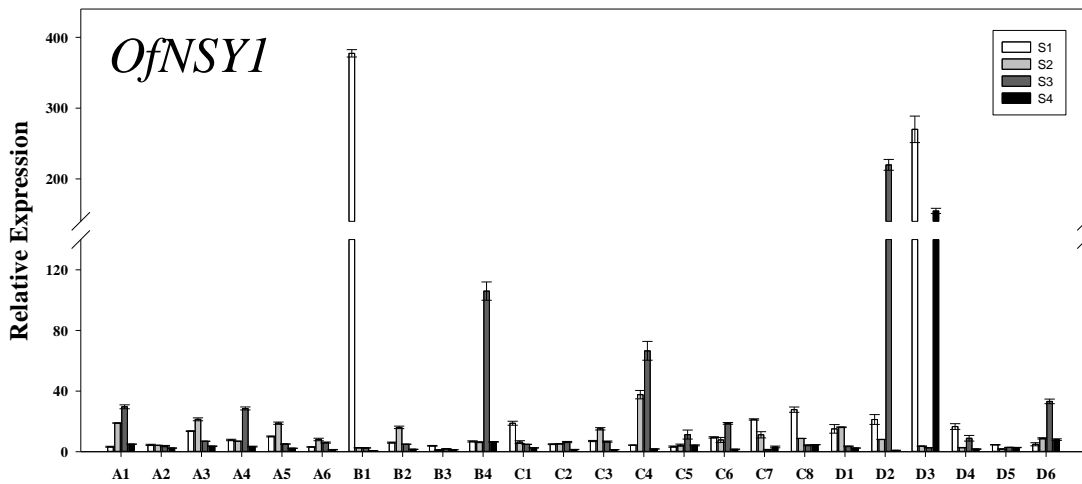

**Figure S19.** Expression pattern of *OfNSY1* in petals of the 24 cultivars during the flowering process.

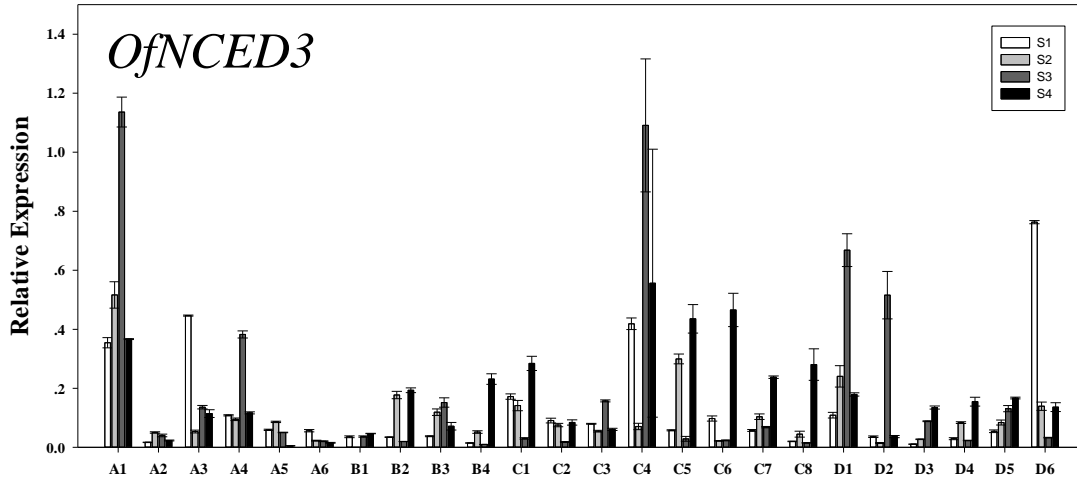

**Figure S20.** Expression pattern of *OfNCED3* in petals of the 24 cultivars during the flowering process.

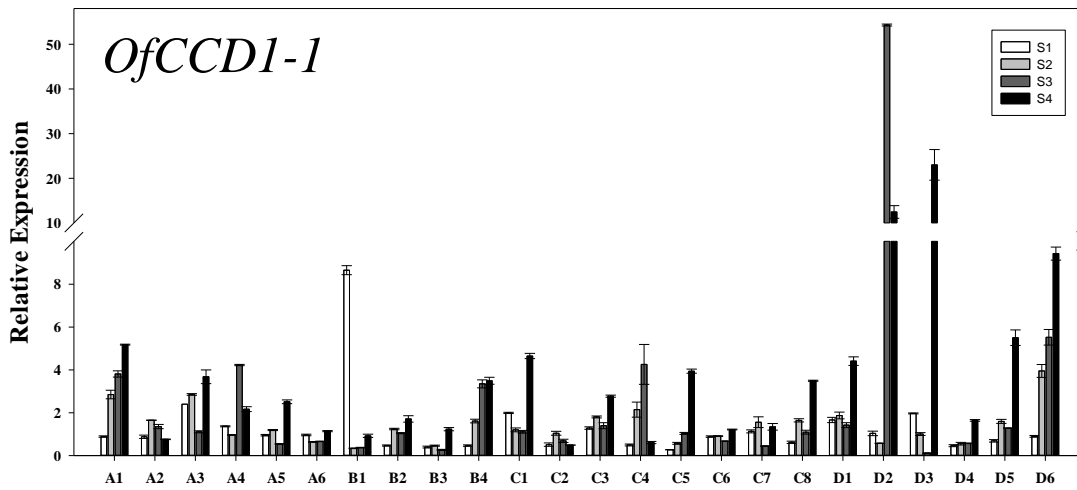

**Figure S21.** Expression pattern of *OfCCD1-1* in petals of the 24 cultivars during the flowering process.

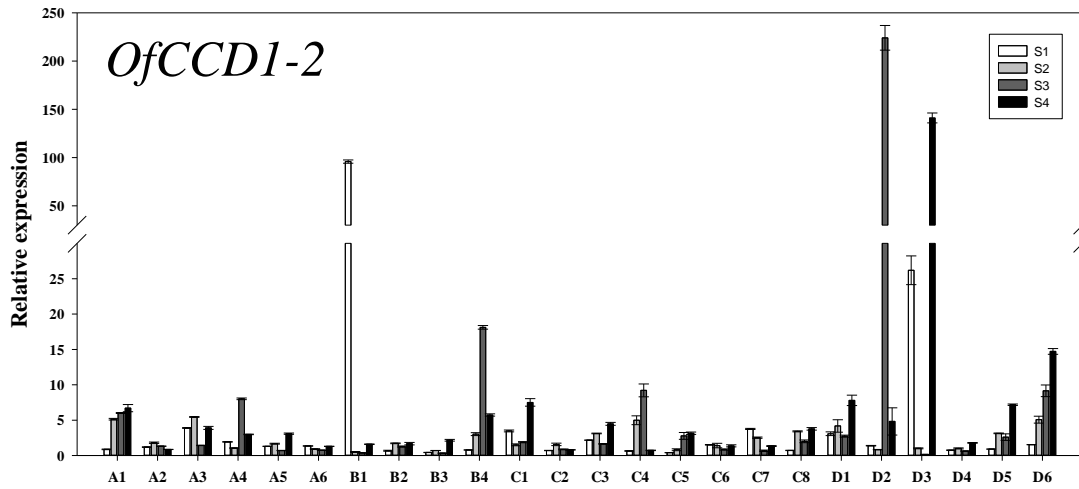

**Figure S22.** Expression pattern of *OfCCD1-2* in petals of the 24 cultivars during the flowering process.

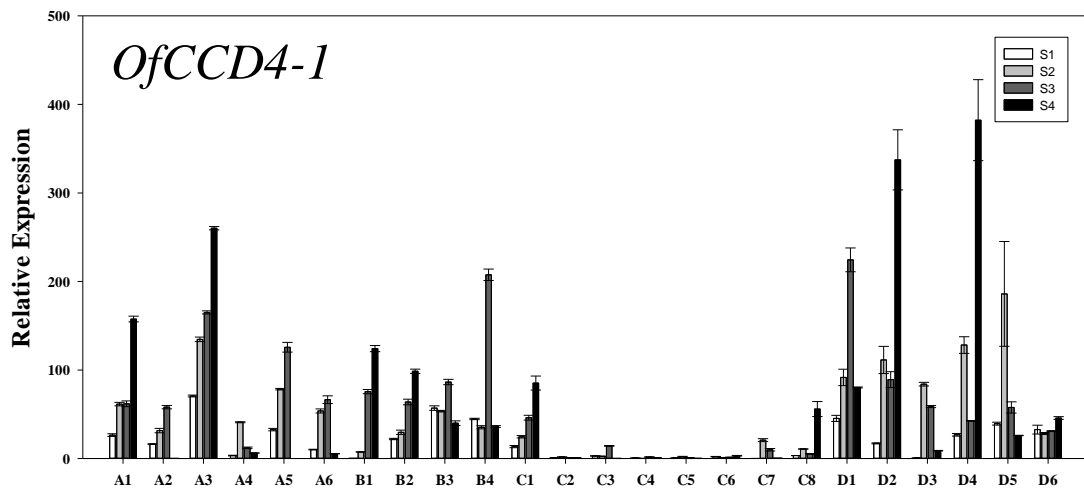

**Figure S23.** Expression pattern of *OfCCD4-1* in petals of the 24 cultivars during the flowering process.

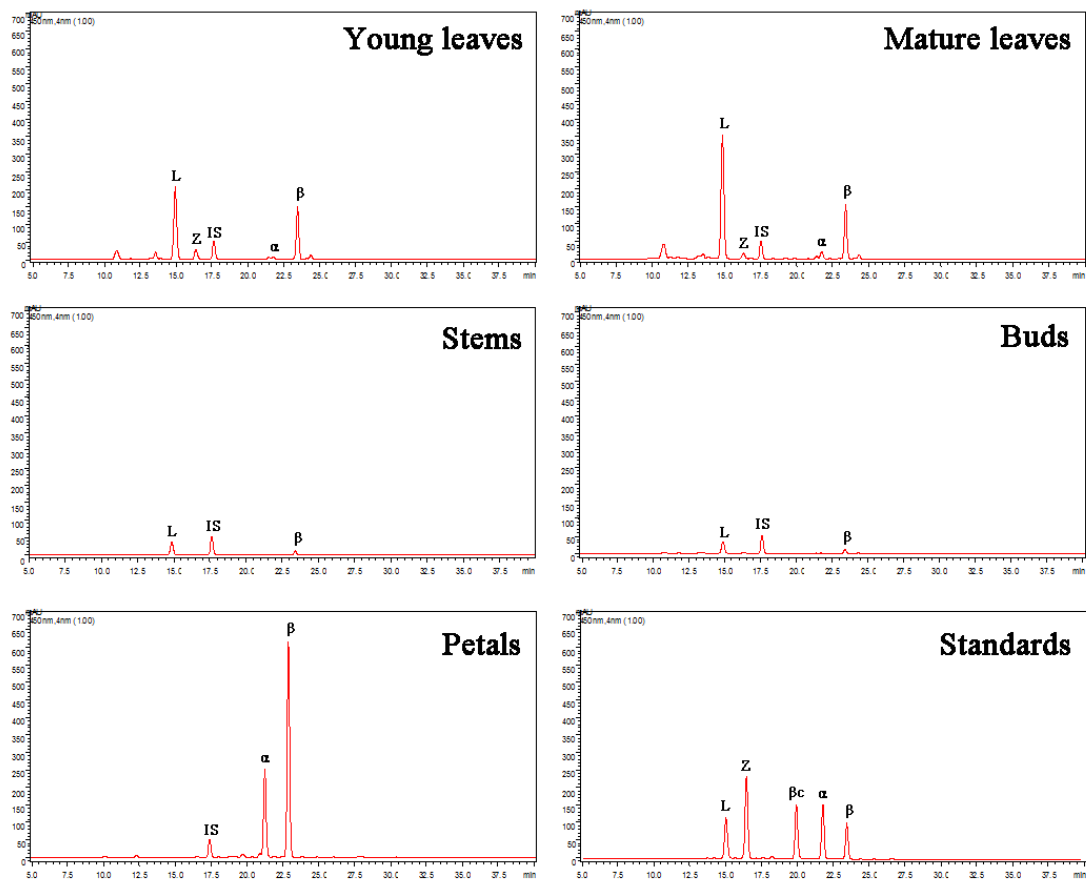

**Figure S24.** The HPLC chromatogram of carotenoids in the young leaves, mature leaves, stems, buds and petals of *O. fragrans* ‘Yan Honggui’, and carotenoid standards obtained at 450 nm. L, lutin; Z, zeaxanthin;  $\beta c$ ,  $\beta$ -cryptoxanthin;  $\alpha$ ,  $\alpha$ -carotene;  $\beta$ ,  $\beta$ -carotene; IS, internal standard.
