# Supplementary material for: Carotenoid Accumulation and Its Contribution to Flower Coloration of Osmanthus fragrans
Source: PubMed Central journal article supplement (PMC6232703; doi:10.3389/fpls.2018.01499), 2018-10-16
Supplement: Table_1.pdf [file Table_1.pdf]

## Supplementary Material

### Carotenoid accumulation and its contribution to flower coloration of *Osmanthus fragrans*

Yiguang Wang<sup>1</sup>, Chao Zhang<sup>1\*</sup>, Bin Dong<sup>1</sup>, Jianxin Fu<sup>1</sup>, Shaoqing Hu<sup>2</sup>, Hongbo Zhao<sup>1\*</sup>

<sup>1</sup>Department of Ornamental Horticulture, School of Landscape Architecture, Zhejiang Agriculture and Forestry University, Hangzhou, China

<sup>2</sup>College of Civil Engineering and Architecture, Zhejiang Sci-Tech University, Hangzhou, China

**\*Correspondence:**

Chao Zhang  
zhangchao24804@gmail.com  
Hongbo Zhao  
zhaohb@zafu.edu.cn

#### Supplementary Tables

**Table S1.** Primers for carotenoid metabolic genes and reference gene in *O. fragrance* petals.

| Gene            | Forward primer sequence (5'-3') | Reverse primer sequence (5'-3') |
|-----------------|---------------------------------|---------------------------------|
| <i>OfPSY1</i>   | CGCCTGAAGCATTGGATCGTTGG         | TTCCAGAGGTCCATCCGCATTCC         |
| <i>OfPDS1</i>   | TATCCTCATCGTTTCGTAATTCTCC       | TTCATACCAGTCTCCATCATCATC        |
| <i>OfZ-ISO1</i> | GCCAACCTTCGGTCTCCATTCCAG        | TTGGGCAGGTACTTTGGTGTGTGG        |
| <i>OfZDS1</i>   | CAGCTTCGTTATAATGGTTGGGTA        | GAAAAATCTGCGTCTGGTGTGTAG        |
| <i>OfCRTISO</i> | GAAAAACAAGGATTCTCGGA            | GCAGATAGTAGGCAAGGGTCAA          |
| <i>OfLCYE1</i>  | AATTATGGTGTGTGGGAAGATGAG        | CAGCACACCTCTTCAGTAACTCCTC       |
| <i>OfLCYB1</i>  | GAAAGGAGACGCCAAAGGGAG           | GGAAGAAATAGCCGAGATGATAAGA       |
| <i>OfCHYE1</i>  | CATCCGCCTGTCCTGTTGAGAAG         | ATCTTGACCAGCATTGACCTTGTAGTT     |
| <i>OfCHYB2</i>  | ACGAGTCGCACCATAAACCA            | CCAAACACCGTAATCCCAAG            |
| <i>OfZEP1</i>   | GATGGGGCATTTCGTAAGTACTG         | ATGGATGAAAACGAACAGGGAA          |
| <i>OfVDE1</i>   | CTGAACATAAGGAGCAAGCCAT          | CCGCTGAAATACTCCATACCAC          |
| <i>OfNSY1</i>   | ACACCACTTTATCACAAGGCGTG         | AAATCTGTAACATTCCCTGGTGC         |
| <i>OfNCED3</i>  | TTTCAACGAATGTGACGAGGGAT         | GGCAAGATACGCATAGCGGGTTT         |
| <i>OfCCD1-1</i> | TGACAAGATTGCTAAGGTAAGTCTG       | TCCAGGTCCCAGATCAAAGATAC         |
| <i>OfCCD1-2</i> | GCGGCATCCTGGTATCACATCTGAA       | TGGGCAGTTCGACAACAGCAACA         |
| <i>OfCCD4-1</i> | ACTTTTGTGACCTCCTCTTCG           | TGACATATCGGCTACAAAGAGTGG        |
| <i>OfACT</i>    | CCCAAGGCAAACAGAGAAAAAAT         | ACCCCATCACCAGAATCAAGAA          |

**Table S2.** Content of carotenoid components in petals of the 24 *O. fragrans* cultivars at full flowering stage.

| Sample NO. | Content ( $\mu\text{g/g}$ , DW) |                  |                   |                  |                      |                      |
|------------|---------------------------------|------------------|-------------------|------------------|----------------------|----------------------|
|            | c1                              | c2               | c3                | c4               | c5                   | c6                   |
| A1         | 8.11 $\pm$ 0.33                 | 2.48 $\pm$ 0.70  | 1.88 $\pm$ 1.61   | 2.76 $\pm$ 1.71  | 9.16 $\pm$ 0.44      | 14.93 $\pm$ 0.53     |
| A2         | 3.74 $\pm$ 0.05                 | 5.57 $\pm$ 0.19  | 0.45 $\pm$ 0.13   | 1.70 $\pm$ 0.18  | 5.66 $\pm$ 0.04      | 26.43 $\pm$ 0.09     |
| A3         | 10.63 $\pm$ 0.55                | 1.78 $\pm$ 0.11  | 0.52 $\pm$ 0.07   | 0.57 $\pm$ 0.10  | 4.99 $\pm$ 0.09      | 9.51 $\pm$ 0.18      |
| A4         | 11.81 $\pm$ 0.30                | 2.23 $\pm$ 0.15  | 1.55 $\pm$ 0.61   | 2.13 $\pm$ 0.04  | 22.09 $\pm$ 0.04     | 55.98 $\pm$ 0.27     |
| A5         | 8.74 $\pm$ 0.16                 | 1.46 $\pm$ 0.10  | -                 | 0.68 $\pm$ 0.07  | 0.96 $\pm$ 0.15      | 5.38 $\pm$ 0.06      |
| A6         | 5.40 $\pm$ 0.80                 | 1.58 $\pm$ 0.03  | 1.18 $\pm$ 0.10   | 1.59 $\pm$ 0.06  | 5.24 $\pm$ 0.02      | 57.01 $\pm$ 0.25     |
| B1         | 10.54 $\pm$ 0.22                | 1.63 $\pm$ 0.15  | 1.51 $\pm$ 0.42   | 1.55 $\pm$ 0.12  | 9.28 $\pm$ 0.11      | 32.87 $\pm$ 0.16     |
| B2         | 6.20 $\pm$ 0.15                 | 1.47 $\pm$ 0.12  | 0.82 $\pm$ 0.30   | 0.57 $\pm$ 0.13  | 5.39 $\pm$ 0.19      | 18.64 $\pm$ 0.18     |
| B3         | 12.77 $\pm$ 0.08                | 1.81 $\pm$ 0.24  | 1.22 $\pm$ 0.12   | 1.79 $\pm$ 0.13  | 11.79 $\pm$ 0.07     | 28.79 $\pm$ 0.25     |
| B4         | 7.99 $\pm$ 0.63                 | 1.05 $\pm$ 0.09  | 0.44 $\pm$ 0.00   | 0.31 $\pm$ 0.04  | 2.37 $\pm$ 0.04      | 8.12 $\pm$ 0.14      |
| C1         | 39.16 $\pm$ 4.63                | 22.14 $\pm$ 0.09 | 97.79 $\pm$ 10.29 | 81.43 $\pm$ 9.90 | 1963.50 $\pm$ 192.20 | 3166.68 $\pm$ 302.84 |
| C2         | 44.30 $\pm$ 1.08                | 22.43 $\pm$ 0.47 | 119.07 $\pm$ 1.05 | 87.70 $\pm$ 0.84 | 2382.77 $\pm$ 9.18   | 7720.69 $\pm$ 40.09  |
| C3         | 36.26 $\pm$ 0.81                | 16.28 $\pm$ 0.33 | 67.64 $\pm$ 0.40  | 62.90 $\pm$ 0.28 | 1136.86 $\pm$ 4.10   | 1988.12 $\pm$ 5.57   |
| C4         | 40.58 $\pm$ 0.08                | 21.31 $\pm$ 0.17 | 109.18 $\pm$ 0.75 | 84.05 $\pm$ 0.29 | 2178.81 $\pm$ 9.75   | 6737.60 $\pm$ 30.43  |
| C5         | 40.52 $\pm$ 0.29                | 21.06 $\pm$ 0.14 | 95.17 $\pm$ 0.42  | 80.84 $\pm$ 0.09 | 1967.61 $\pm$ 4.25   | 5645.12 $\pm$ 16.83  |
| C6         | 41.77 $\pm$ 1.36                | 20.86 $\pm$ 0.79 | 101.26 $\pm$ 0.74 | 75.26 $\pm$ 1.35 | 1622.72 $\pm$ 3.97   | 4602.97 $\pm$ 20.44  |
| C7         | 28.49 $\pm$ 1.70                | 11.99 $\pm$ 0.25 | 75.62 $\pm$ 0.66  | 51.49 $\pm$ 0.93 | 842.61 $\pm$ 3.27    | 1380.08 $\pm$ 8.23   |
| C8         | 13.79 $\pm$ 0.21                | 3.65 $\pm$ 0.46  | 11.70 $\pm$ 1.07  | 11.84 $\pm$ 1.21 | 128.67 $\pm$ 1.02    | 369.95 $\pm$ 3.53    |
| D1         | 9.34 $\pm$ 0.16                 | 1.63 $\pm$ 0.14  | -                 | 0.71 $\pm$ 0.02  | 3.84 $\pm$ 0.05      | 11.60 $\pm$ 0.07     |
| D2         | 9.29 $\pm$ 0.19                 | 1.31 $\pm$ 0.03  | -                 | 0.37 $\pm$ 0.00  | 1.70 $\pm$ 0.13      | 10.65 $\pm$ 0.07     |
| D3         | 7.69 $\pm$ 0.19                 | 0.95 $\pm$ 0.07  | 0.30 $\pm$ 0.01   | 0.78 $\pm$ 0.32  | 2.06 $\pm$ 0.18      | 9.28 $\pm$ 0.15      |
| D4         | 9.59 $\pm$ 0.56                 | 1.16 $\pm$ 0.05  | 2.07 $\pm$ 0.19   | 1.44 $\pm$ 0.04  | 4.36 $\pm$ 0.10      | 46.46 $\pm$ 0.20     |
| D5         | 8.43 $\pm$ 0.06                 | 0.83 $\pm$ 0.08  | 0.51 $\pm$ 0.12   | 0.83 $\pm$ 0.12  | 7.58 $\pm$ 0.15      | 13.83 $\pm$ 0.14     |
| D6         | 10.18 $\pm$ 0.08                | 1.33 $\pm$ 0.05  | 0.54 $\pm$ 0.04   | 0.76 $\pm$ 0.02  | 3.03 $\pm$ 0.21      | 9.18 $\pm$ 0.12      |
